# Supplementary material for: Foliar Application of CeO2 Nanoparticles Alters Generative Components Fitness and Seed Productivity in Bean Crop (Phaseolus vulgaris L.)
Source: MDPI journal article supplement (doi:10.3390/nano11040862), 2021-03-28
Supplement: s1 [file s1]

## Supplementary materials

# Foliar Application of CeO<sub>2</sub> Nanoparticles Alters Generative Components Fitness and Seed Productivity in Bean Crop (*Phaseolus vulgaris* L.)

Hajar Salehi <sup>1</sup>, Abdolkarim Chehregani Rad <sup>1,\*</sup>, Ali Raza <sup>2</sup> and Jen-Tsung Chen <sup>3,\*</sup>

- <sup>1</sup> Laboratory of Plant Cell Biology, Department of Biology, Bu Ali Sina University, Hamedan 65174, Iran; hajarsalehi@ymail.com  
<sup>2</sup> Key Lab of Biology and Genetic Improvement of Oil Crops, Oil Crops Research Institute, Chinese Academy of Agricultural Sciences (CAAS), Wuhan 430062, China; alirizamughal143@gmail.com  
<sup>3</sup> Department of Life Sciences, National University of Kaohsiung, Kaohsiung 811, Taiwan  
 \* Correspondence: chehregani@basu.ac.ir (A.C.R.); jentsung@nuk.edu.tw (J.-T.C.)

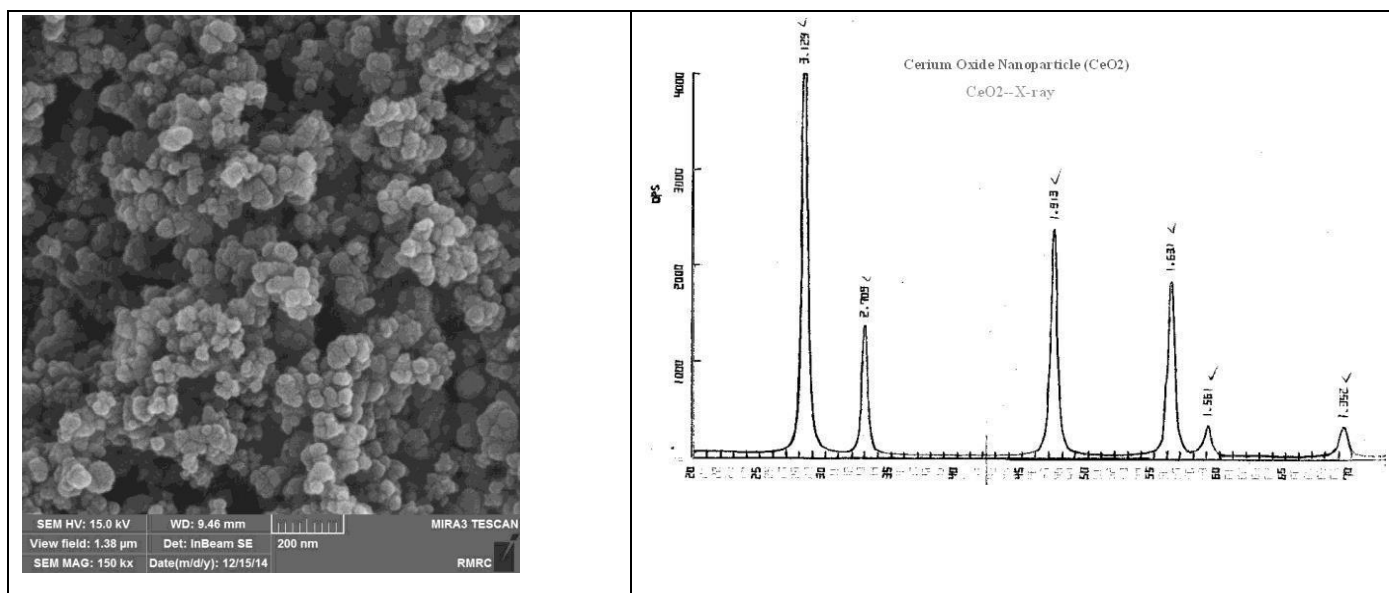

**Figure S1.** TEM (left) and X-ray (right) images of nCeO<sub>2</sub> for particle characterization of size and morphology.

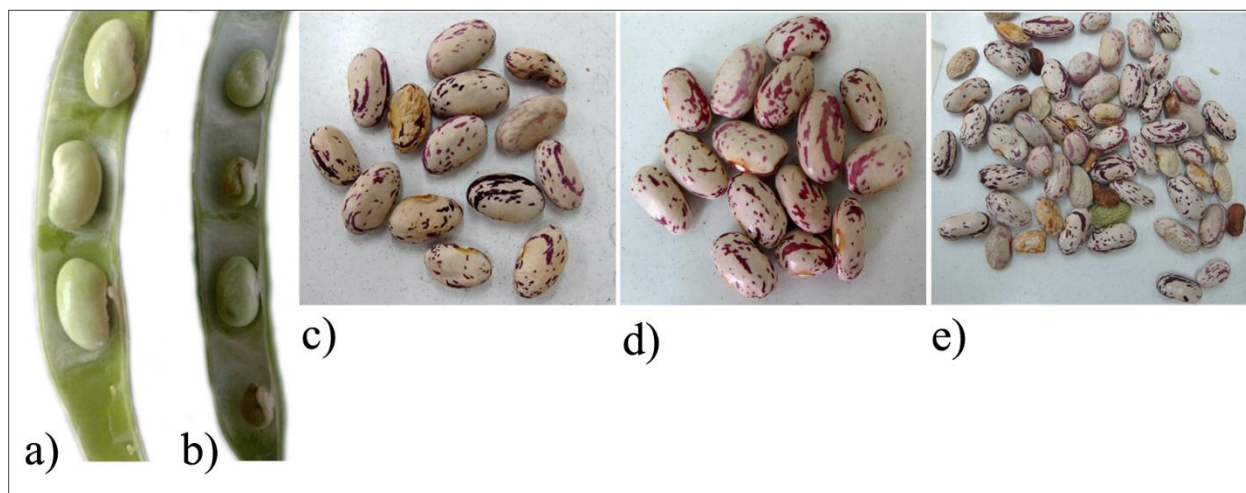

**Figure S2.** The seeds of control (a and d) and nCeO<sub>2</sub>-exposed plants (b, d and e images are related to 250 and 1000 mg L<sup>-1</sup> concentrations).
